# Supplementary material for: Paleoclimate variations in Western Amazon based on Lago Airo (Brazil) diatoms from the last 13,300 years cal BP
Source: Research Square preprint supplement (doi:10.21203/rs.3.rs-7687264/v1), 2025-10-16
Supplement: Supplementary file 1 [file f5bb407e2a83c84ec3e4e5bf.docx]

Supplementary Material

Figure 1. Principal Component Analysis (PCA) of diatom assemblages along the sedimentary profile of Lago Airo (Middle Rio Negro). The analysis displays the ordination of samples based on species composition, with Factor 1 (10.91%) and Factor 2 (5.50%) representing the main gradients. The different colors correspond to the four identified phases: Phase IV (13,400–11,800 cal yr BP, green): Characterized by low diatom density, dominance of periphytic taxa, and high-energy conditions. Sediments are predominantly sandy (>99%), with low TOC (~2.2%) and high C/N ratios (~52.1), reflecting a lotic system connected to the Rio Negro; Phase III (11,800–8,800 cal yr BP, light green): Low-density diatom assemblages, mainly *Eunotia spp.*, with a slight increase in clay content (~2.05%) and TOC (~2.39%). The system begins to transition towards reduced hydrodynamics and increasing organic matter deposition; Phase II (8,800–4,100 cal yr BP, light blue): Similar to Phase III, but with a gradual rise in TOC (~3.47%) and a shift towards increased detrital organic matter transport. The environment remains transitional, with decreasing influence from the Rio Negro; Phase I (4,100 cal yr BP–Present, dark blue): Marked by a significant increase in diatom density (30.9 × 10⁴ to 14.1 × 10⁶ valves/g) and dominance of planktonic taxa (*Aulacoseira spp.*). Sediment composition shifts to higher silt content (~59.1%), with rising TOC (~25.0%) and lower C/N ratios (~34.9), indicating a fully developed lentic system with increasing water levels, likely driven by intensified precipitation from the South American Monsoon System. The PCA plot reveals a clear separation between the earlier high-energy, lotic system (green and light green clusters) and the more recent low-energy, lentic conditions (light blue and dark blue clusters), reflecting long-term hydrological and climatic changes in Lago Airo.

Figure 2. Distribution of diatoms along the sedimentary profile of Lago Airo (Middle Rio Negro). The scatter plot shows the ordination of diatom assemblages based on a factorial analysis, with Factor 1 (10.91%) and Factor 2 (5.50%) representing the main gradients in species composition. Blue-labeled points correspond to the present-day diatom community, while green-labeled points correspond to past assemblages. The transition from predominantly periphytic taxa in earlier phases (Phase IV and III) to planktonic taxa (e.g., Aulacoseira spp.) in Phase I reflects increased water levels and reduced influence of the Rio Negro over time. This shift is associated with changes in sediment composition, from predominantly sandy deposits (>99%) in Phase IV to increasing silt content (59.1%) in Phase I, as well as geochemical shifts such as rising TOC (from 2.2% in Phase IV to 25.0% in Phase I) and decreasing C/N ratios (from ~52.1 to ~34.9). These changes suggest a transition from a high-energy, lotic system with low diatom sedimentation to a lower-energy, lentic system with increased autochthonous organic matter production, likely driven by increased precipitation associated with the South American Monsoon System.
